# Supplementary material
Source: PubMed Central journal article supplement (PMC2672519)
Supplement: 0901128106_0901128106SI.pdf [file 0901128106_0901128106SI.pdf]

# Supporting Information

Mintern et al. 10.1073/pnas.0901128106

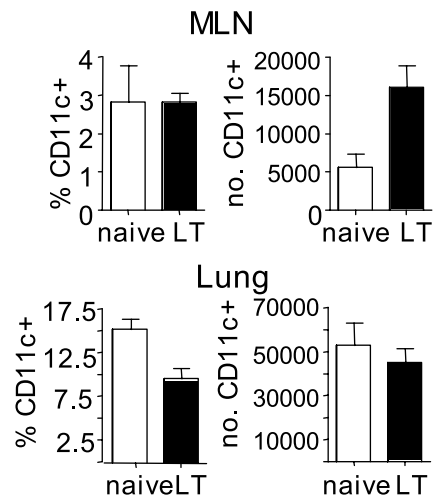

**Fig. S1.** Comparison of DC numbers between naïve and LT-infected mice. The prevalence of CD11c+ DCs in MLN and lung samples from naïve mice or mice infected i.n. 30–60 d previously with the X31 influenza A virus. Graphs represent mean  $\pm$  SEM from 3 independent experiments, with 3 organs pooled for analysis in each case.
